# Supplementary material for: Rapid detection of mercury contamination in water by surface enhanced Raman spectroscopy
Source: Royal Society of Chemistry journal article supplement (doi:10.1039/c7ra02209c), 2017-01-01
Supplement: c7ra02209c1.pdf [file c7ra02209c1.pdf]

## Electronic Supplementary Material (ESI) for RSC Advances

### Rapid detection of mercury contamination in water by surface enhanced Raman spectroscopy

Daniel K. Sarfo <sup>a</sup>, Arumugam Sivanesan <sup>a</sup>, Emad L. Izake <sup>a</sup>, and  
Godwin A. Ayoko<sup>a,\*</sup>

<sup>a</sup> *Queensland University of Technology (QUT), School of Chemistry, Physics and Mechanical Engineering, Nanotechnology and Molecular Science, 2 George Street, QLD 4001, Australia.*

Corresponding Author

Prof Godwin A. Ayoko: Email: g.ayoko@qut.edu.au

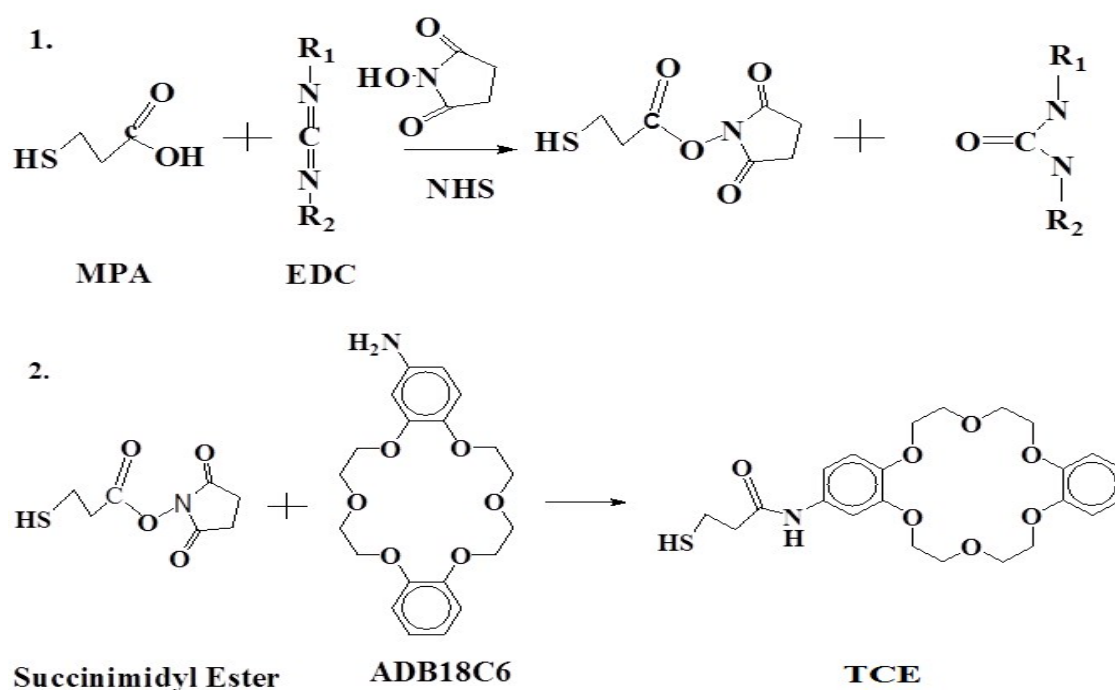

**ESI 1**, Attachment of MPA to the ADB18C6 molecule by the EDC/NHS coupling reaction  
( $R_1 = \text{CH}_2\text{CH}_3$ ,  $R_2 = (\text{CH}_2)_3\text{N}^+\text{H}(\text{CH}_3)_2\text{Cl}^-$ )

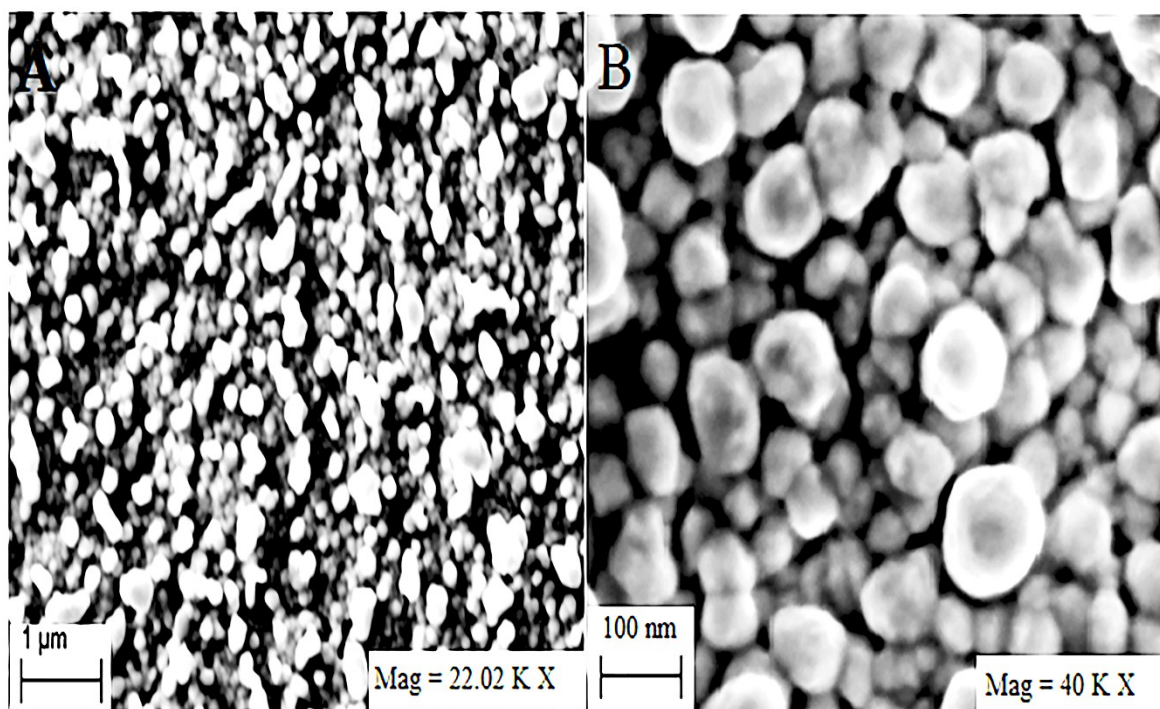

ESI 2: SEM images AuNS coated gold substrate

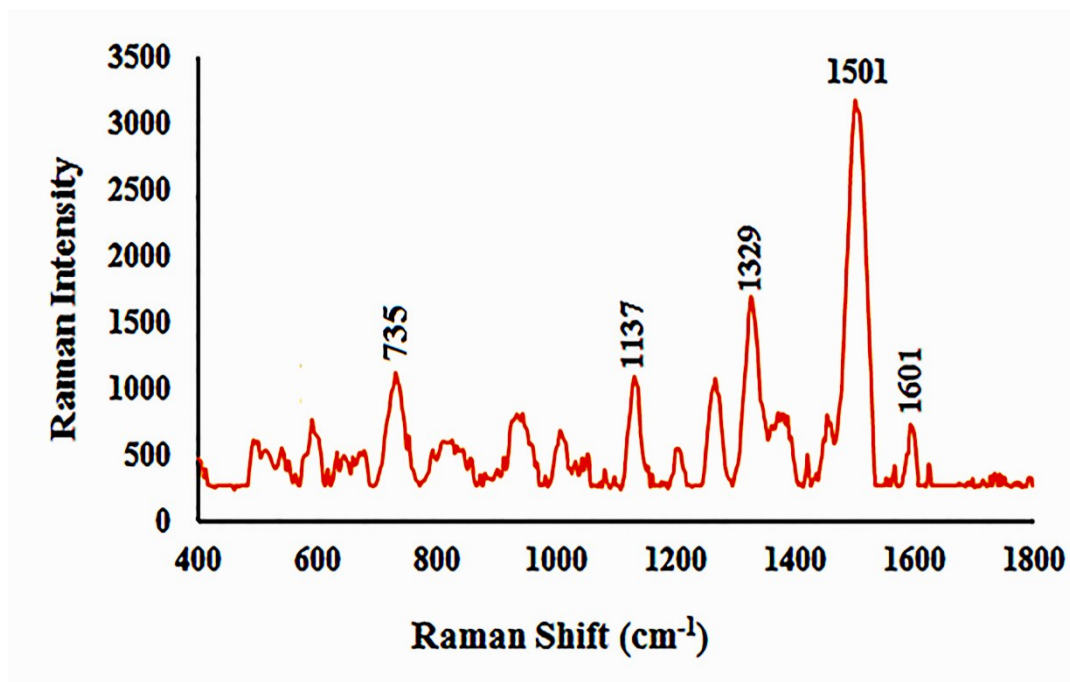

ESI 3: SERS spectra of 1  $\mu\text{MHg-ADB18C6}$  Complex

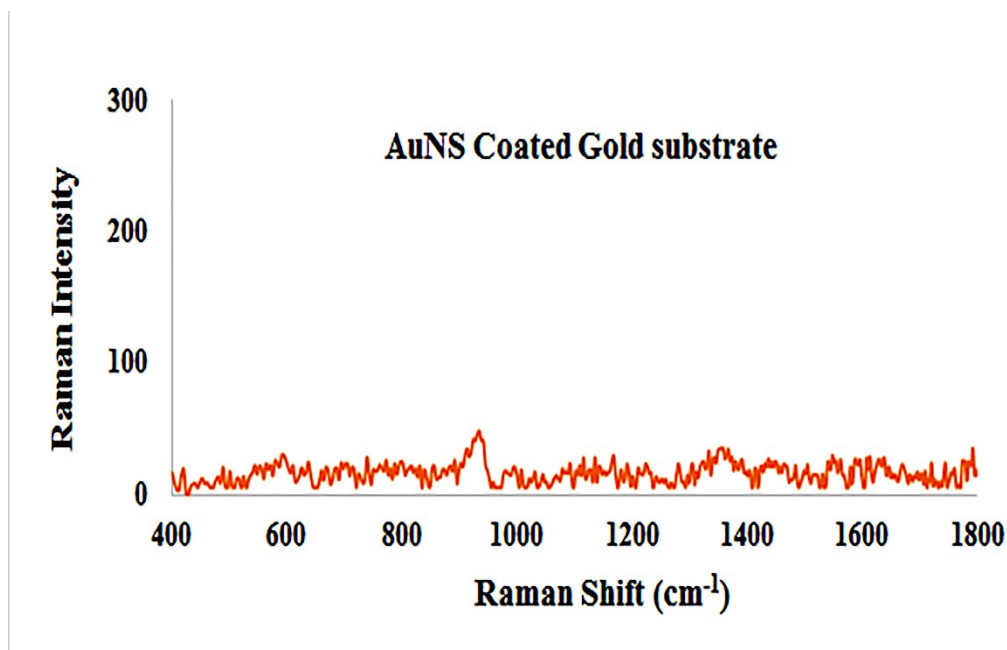

ESI 4: SERS spectra of unmodified AuNS coated gold substrate after 15 minutes oxygen plasma cleaning

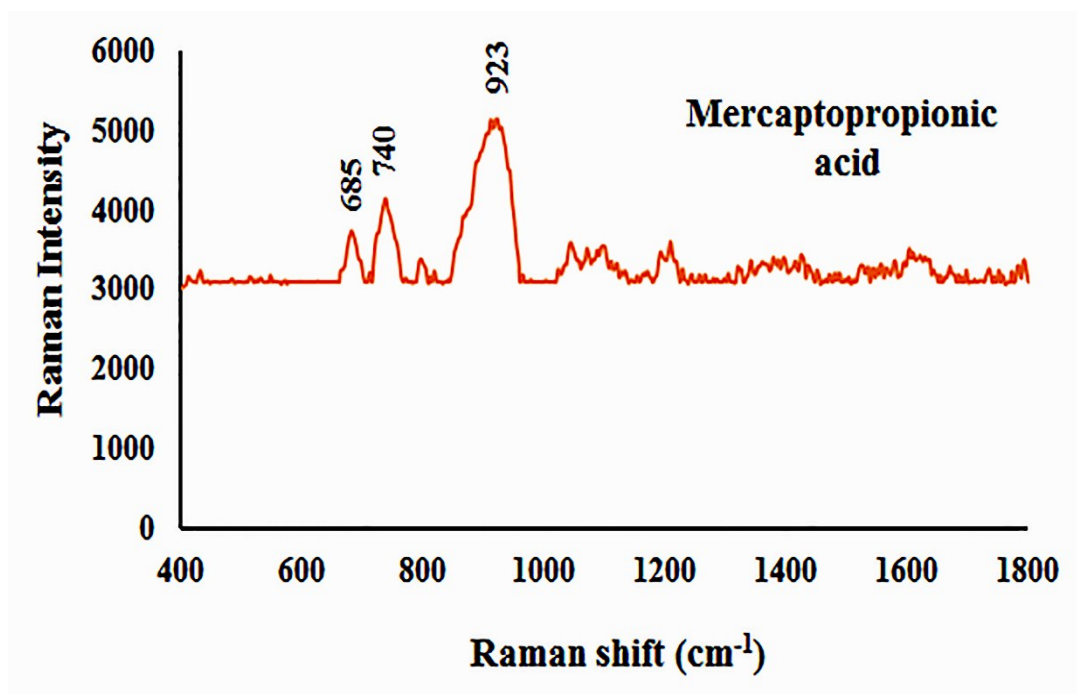

ESI 5: SERS spectra of 0.4mM Mercaptopropionic acid

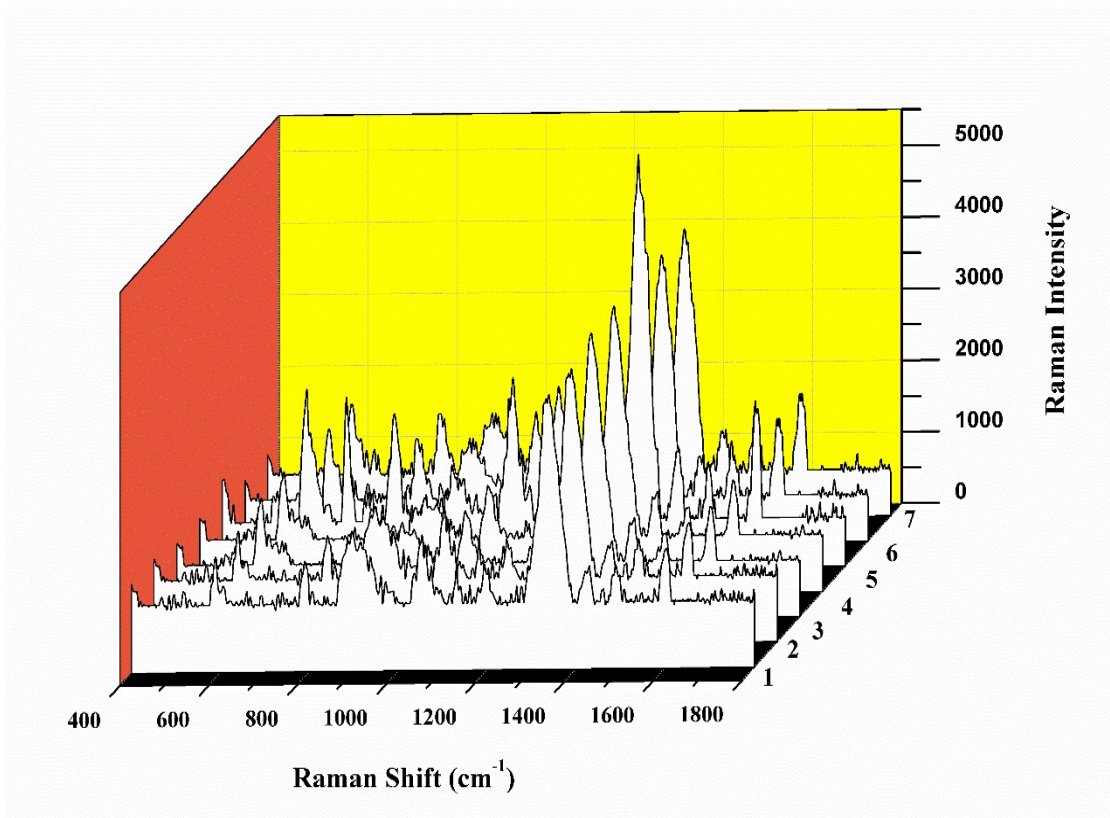

ESI 6: Raman spectra of 0.1pM Hg(II) in thiolated 4-amino-dibenzo-18-crown-6 taken from 7 different substrates.

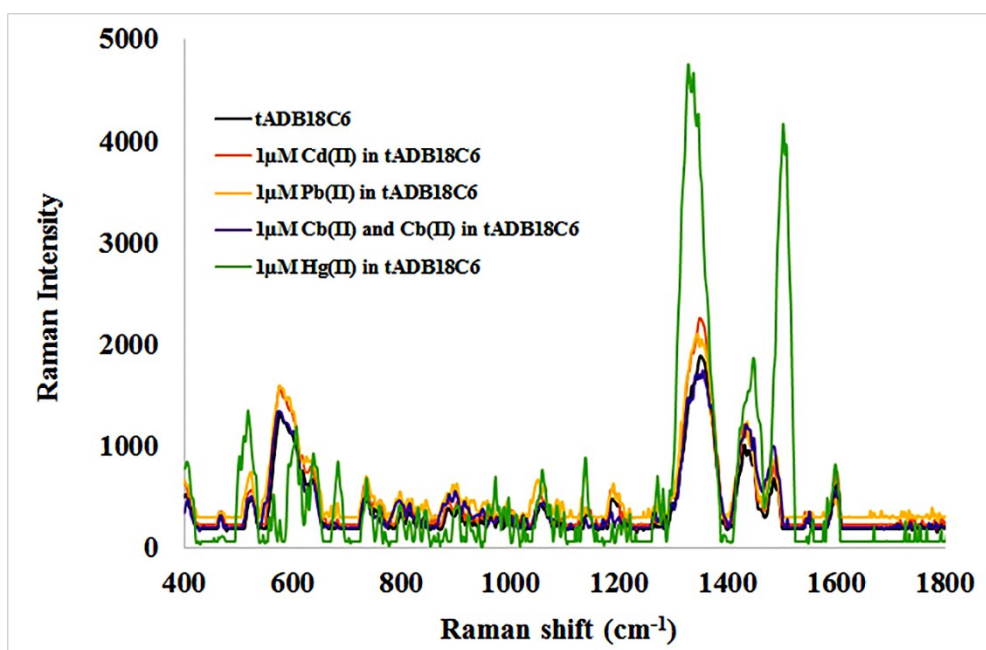

ESI 7: SERS spectra of TCE and Cd(II), Pb(II), Cd(II) and Pb(II) and Hg(II) in TCE respectively

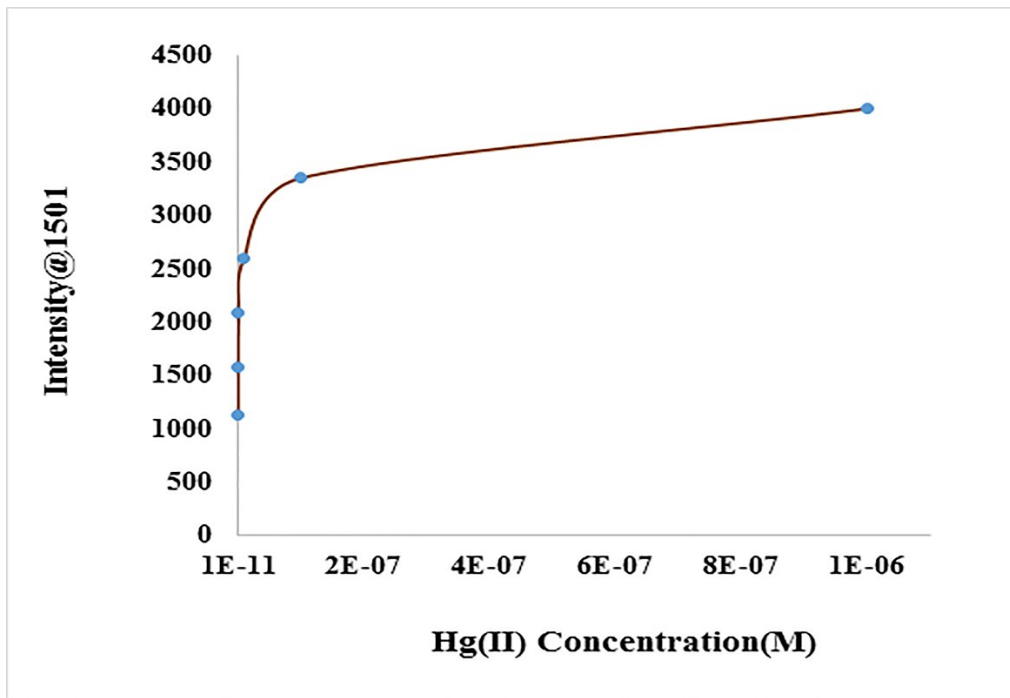

ESI 8: A plot of Raman intensity@1501 verses Hg concentration (M)
